# Supplementary material
Source: publisher figshare collection journal article supplement (https://tandf.figshare.com/ndownloader/files/20024552)
Supplement: Supplementary file 1 [file 20024552]

**Supplementary Material**

Cu(II)-Sulfamethazine complex with *N*-(2-hydroxyethyl)-ethylenediamine: Synthesis, spectroscopic, structural characterization and antimicrobial activity

FILIZ ÖZTÜRK*, TUĞBA AYCAN and NILGÜN ÖZDEMİR

Table S1. Selected bond distances (Å) and angles (º) of the complex and similar structure reported in the literature.

|  | Complex | [25, 26] |  | Complex | [26] |
| --- | --- | --- | --- | --- | --- |
| Bond lengths (Å) |  |  | Bond angles (º) |  |  |
| Cu1-N1 | 2.030(8) | 2.036(3) | N2-Cu1-N3 | 158.4(4) | 166.0 |
| Cu1-N2 | 2.037(2) | 2.012(4) | N2-Cu1-N4 | 96.0(3) | 95.0 |
| Cu1-N3 | 2.004(9) | 2.041(3) | N4-Cu1-N3 | 86.3(3) | 84.9 |
| Cu1-N4 | 2.020(8) | 2.018(4) | N2-Cu1-N1 | 85.7(4) | 84.8 |
| Cu1-O1 | 2.330(7) | 2.419(3) | N1-Cu1-N3 | 95.0(3) | 98.7 |
| Cu2-N5 | 2.022(8) | - | N1-Cu1-N4 | 172.1(4) | 165.7 |
| Cu2-N6 | 2.010(9) | - | N2-Cu1-O1 | 110.1(4) | 89.6 |
| Cu2-N7 | 1.991(9) | - | N3-Cu1-O1 | 91.2(3) | 76.6 |
| Cu2-N8 | 2.023(9) | - | N4-Cu1-O1 | 93.3(3) | 96.6 |
| Cu2-O3 | 2.308(7) | - | N1-Cu1-O1 | 78.9(3) | 97.7 |
| N11-C23 | 1.368(13) | 1.374(3) | N7-Cu2-N6 | 158.7(4) | - |
| N11-S1 | 1.573(8) | 1.568(2) | N7-Cu2-N5 | 95.6(3) | - |
| N15-C33 | 1.372(13) | - | N7-Cu2-N8 | 85.8(4) | - |
| N15-S2 | 1.584(9) | - | N6-Cu2-N5 | 85.4(4) | - |
| N19-C43 | 1.373(14) | - | N6-Cu2-N8 | 95.8(3) | - |
| N19-S3 | 1.591(9) | - | N5-Cu2-N8 | 172.9(4) | - |
| N23-C53 | 1.385(12) | - | N7-Cu2-O3 | 92.1(3) | - |
| N23-S4 | 1.567(8) | - | N6-Cu2-O3 | 108.8(3) | - |
|  |  |  | N5-Cu2-O3 | 78.9(3) | - |
|  |  |  | N8-Cu2-O3 | 94.2(3) | - |

Table S2. Hydrogen bonding geometry of 2([Cu(hydeten)2]∙smz2)∙na∙5H2O.

| D-H···A | D-H | H···A | D···A | D-H···A |
| --- | --- | --- | --- | --- |
| C8—H8B···O4i | 0.97 | 2.56 | 3.469(13) | 156 |
| N1—H1···N12iii | 0.98 | 2.54 | 3.428(16) | 150 |
| N1—H1···O5 | 0.98 | 2.42 | 3.126(11) | 129 |
| N2—H2C···O3W | 0.89 | 2.21 | 2.969(14) | 143 |
| N2—H2D···O11 | 0.89 | 2.24 | 3.038(13) | 149 |
| N3—H3C···N15 | 0.89 | 2.10 | 2.960(12) | 163 |
| N3—H3D···O5 | 0.89 | 2.40 | 3.061(11) | 131 |
| N4—H4···O4W | 0.98 | 2.00 | 2.970(13) | 169 |
| N5—H5···N24iv | 0.98 | 2.56 | 3.424(16) | 147 |
| N5—H5···O12 | 0.98 | 2.41 | 3.113(11) | 129 |
| N6—H6C···O6 | 0.89 | 2.20 | 3.017(12) | 152 |
| N6—H6D···O2W | 0.89 | 2.17 | 2.950(14) | 146 |
| N7—H7C···O12 | 0.89 | 2.37 | 3.033(11) | 131 |
| N7—H7D···N19v | 0.89 | 2.07 | 2.937(13) | 163 |
| N8—H8···O5Wvi | 0.98 | 2.00 | 2.969(12) | 170 |
| N12—H12D···N10iv | 0.86 | 2.41 | 3.216(15) | 156 |
| N12—H12D···O5iv | 0.86 | 2.60 | 3.227(14) | 130 |
| N16—H16C···N14iv | 0.86 | 2.56 | 3.320(17) | 149 |
| N16—H16C···O8iv | 0.86 | 2.54 | 3.220(17) | 137 |
| N20—H20D···O13iv | 0.86 | 2.08 | 2.90(2) | 159 |
| N20—H20E···O10iv | 0.86 | 2.20 | 2.987(17) | 152 |
| N24—H24A···N22iii | 0.86 | 2.48 | 3.268(16) | 153 |
| O2—H2···N21 | 0.82 | 2.02 | 2.776(13) | 152 |
| O4—H4C···N9 | 0.82 | 1.97 | 2.751(12) | 159 |
| N25—H25B···O7 | 0.86 | 2.12 | 2.84(2) | 141 |
| O5W—H5WB···N11vii | 0.91 (3) | 2.00 (4) | 2.902(12) | 171(19) |
| O5W—H5WB···O6vii | 0.91 (3) | 2.6 (3) | 3.251(11) | 127(25) |
| O5W—H5WA···O11vii | 0.92 (3) | 2.02 (12) | 2.819(11) | 145(17) |
| O4W—H4WA···O6 | 0.90 (3) | 1.94 (3) | 2.835(11) | 173(8) |
| O4W—H4WB···N23 | 0.89 (3) | 2.03 (4) | 2.903(12) | 165(8) |

Symmetry codes: (i) x−1, y, z−1; (iii) x+1, y, z; (iv) x−1, y, z; (v) −x+1, y+1/2, −z+2; (vi) −x+1, y+1/2, −z+1; (vii) −x, y+1/2, −z+1.

Table S3. Assignment of vibrational FT-IR data (frequency, cm-1) for 2([Cu(hydeten)2]∙smz2)∙na∙5H2O complex.

| Assignments | | Hydeten [55] | | smz | | na | | [Hg(smz)2(DMF)2] [52] | | Complex |  |
| --- | --- | --- | --- | --- | --- | --- | --- | --- | --- | --- | --- |
| *v*(H2O) | | **-** | | - | | - | | - | | 3523m |  |
| *v*as(NH2)(smz) | | - | | 3442 | | - | | 3457 | | 3439s |  |
| *v*as(NH2)(na) | | - | | - | | 3368 | | - | | 3389sh |  |
| *v*s(NH2)(smz) | | - | | 3342 | | - | | 3360 | | 3347s |  |
| *v*(OH) | | 3325 | | - | | - | | - | | 3334s |  |
| *v*as(NH2)+*v*(NH) (hydeten) | | 3218m | | - | | - | | - | | 3271s,3244s |  |
| *v*as(NH2)(hydeten) | | - | | - | | - | | - | | 3217m |  |
| *v*s(NH2)(na) | | - | | - | | 3163 | | - | | 3161m |  |
| *v*(CH)(aromatic) | | - | | 3094,3067, 3059,3039 | | 3060 | | - | | 3061w,3031w |  |
| *v*(CH3)(smz) | | - | | 3003,2963,2922 | | - | | - | | 2967s,2930s |  |
| *vas*(CH2)(hydeten) | | 2947s | | - | | - | | - | | 2945s |  |
| *vas*(CH2)(hydeten) | | 2832s | | - | | - | | - | | 2884w,2869w |  |
| υ(C=O) | | - | | - | | 1697,1679 | | - | | 1684s |  |
| δ(NH2) (smz) | | - | | 1640 | | - | | 1660 | | 1649s |  |
| δ(NH)(hydeten) | | 1603s | | **-** | | **-** | | **-** | | **-** |  |
| δ(NH2) (na) | | - | | **-** | | 1618 | | **-** | | 1630s |  |
| Ring str(py)(smz) | | - | | 1597 | | - | | 1599,1577 | | 1596vs |  |
| υ(C=C)(smz)+ring str(na) | | - | | 1571,1561,1549 | | 1592,1573, 1489,1423 | | - | | 1583s,1565s |  |
| δas(CH3) | | - | | 1507 | | - | | - | | 1501s |  |
| δ(CH2) | | 1456s | | - | | - | | - | | 1469w |  |
| δ(CC) | | - | | 1437,1420 | | - | |  | | 1427sh |  |
| *v*(CN)(na-amide) | | - | | - | | 1395 | | - | | 1408s |  |
| *v*as(SO2) | | - | | 1368,1303 | | - | | 1373, 1292 | | 1375vs,1311w |  |
| δs(CH3)+ ring str(na) | | - | | 1341 | | 1339 | | - | | 1344m |  |
| t(CH2)(hydeten)+ δ(CH)(na) | |  | |  | | 1254 | |  | | 1297w,1287sh, 1275vw,1247sh |  |
| *v*(CN)(Hydeten)+ Ring str(py)(na) | | 1243,1225 | | - | | 1230,1201 | | - | | 1225s,1201sh |  |
| δ(NH) | | 1178 | | 1189 | | - | | - | | 1187vw |  |
| r(NH2)(na) | | - | | - | | 1153 | | - | | 1150sh |  |
| *v*s(SO2) | | - | | 1146 | | - | | 1194 | | 1132sh,1117vs |  |
| *v*(CC)(na) | - | | - | | 1123 | | - | |  | | |
| *v*(CN)(smz)+ δ(CH)(na) | | - | | 1092,1072 | | 1090 | | - | | 1097sh,1091sh |  |
| *v*(CO) | | 1067s | | - | | - | | - | | 1072vs |  |
| r(NH2)(hydeten) | | 1059 | | - | | - | | - | | 1054sh |  |
| *v*(S=O) | | - | | - | | - | | - | | 1045vw |  |
| Ring Breath.(pyridine) | | - | | - | | 1028 | | - | | 1031v |  |
| Ring str(py)(na) | | - | | - | | 995 | | - | | 1002m |  |
| *v*(SN)(smz) | | - | | 974 | | - | | 994, 965 | | 978m |  |
| *v*(MO) | | - | | - | | - | | - | | 555s |  |
| *v*(MN) | | - | | - | | - | | - | | 446w |  |

asy: asymmetric; sym: symmetric; υ: stretching; δ: in plane; γ: out of plane, vs: very strong; s: strong; m: medium; w: weak; vw: very weak; sh: shoulder


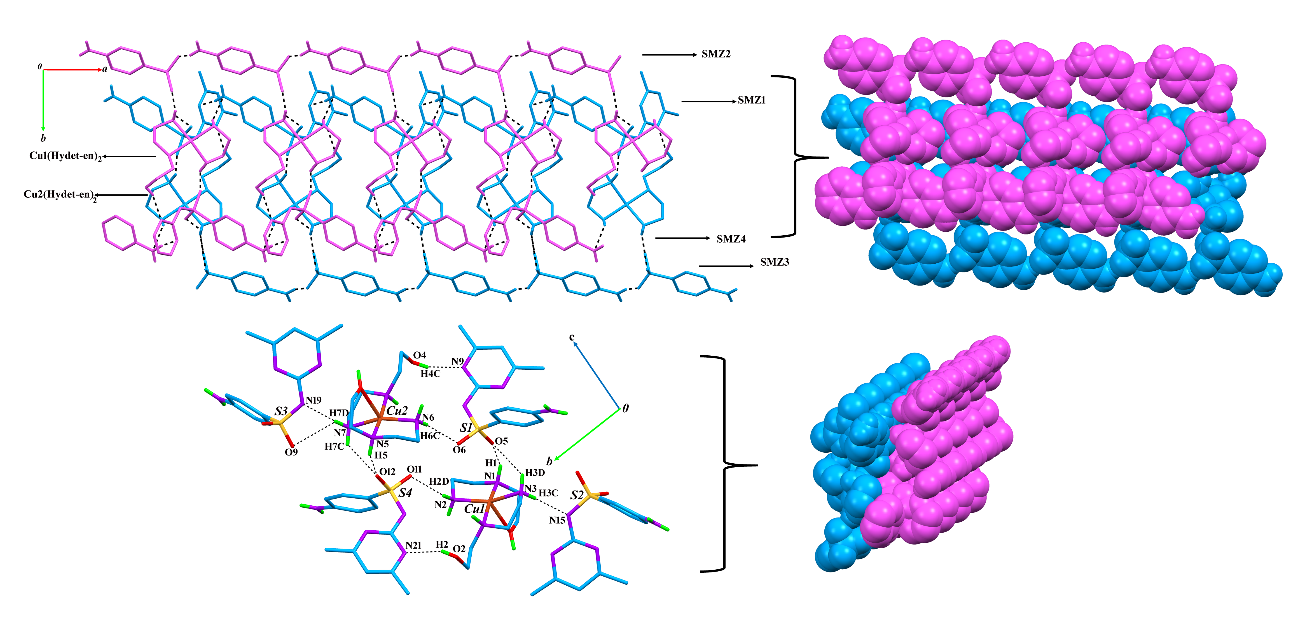


Figure S1. (a) 1D pseudo-rectangular-shaped structure formed by binding by intramolecular H-bonds Figure 4(a) and Figure 4(b) each other, (b) the spacefill view of 1D pseudo-rectangular-shaped structure, (c) the view from a direction of supramolecular structure, (d) the spacefill view from a-direction (Hydrogen atoms have been omitted for clarity).


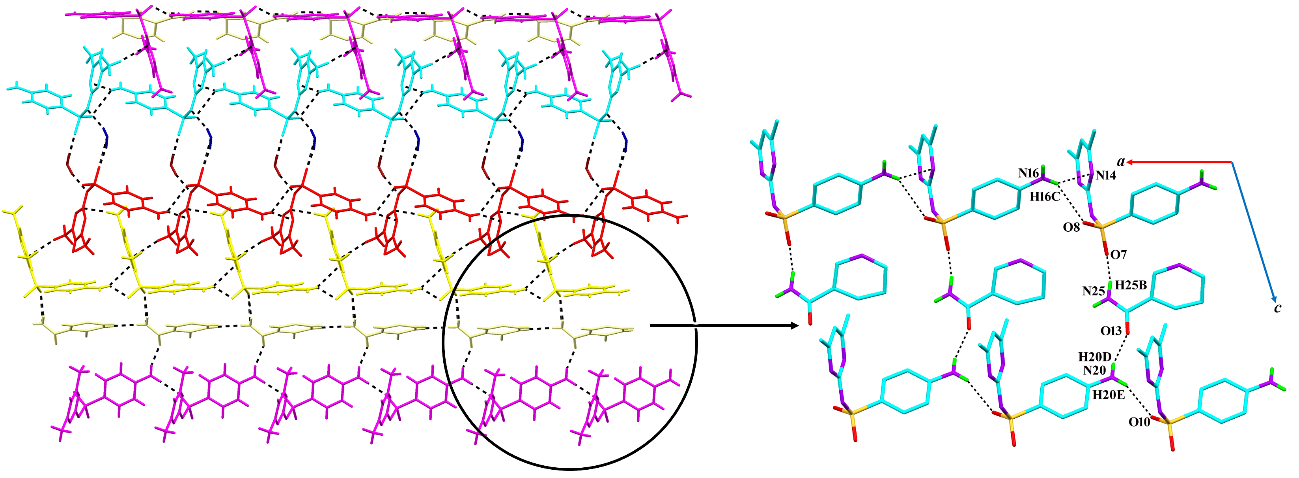


Figure S2. 2D supramolecular structure formed with progressing of 1D pseudo-rectangular-shaped structure (the nicotinamide ligand is bridging between smz2 and smz3) (Hydrogen atoms have been omitted for clarity).


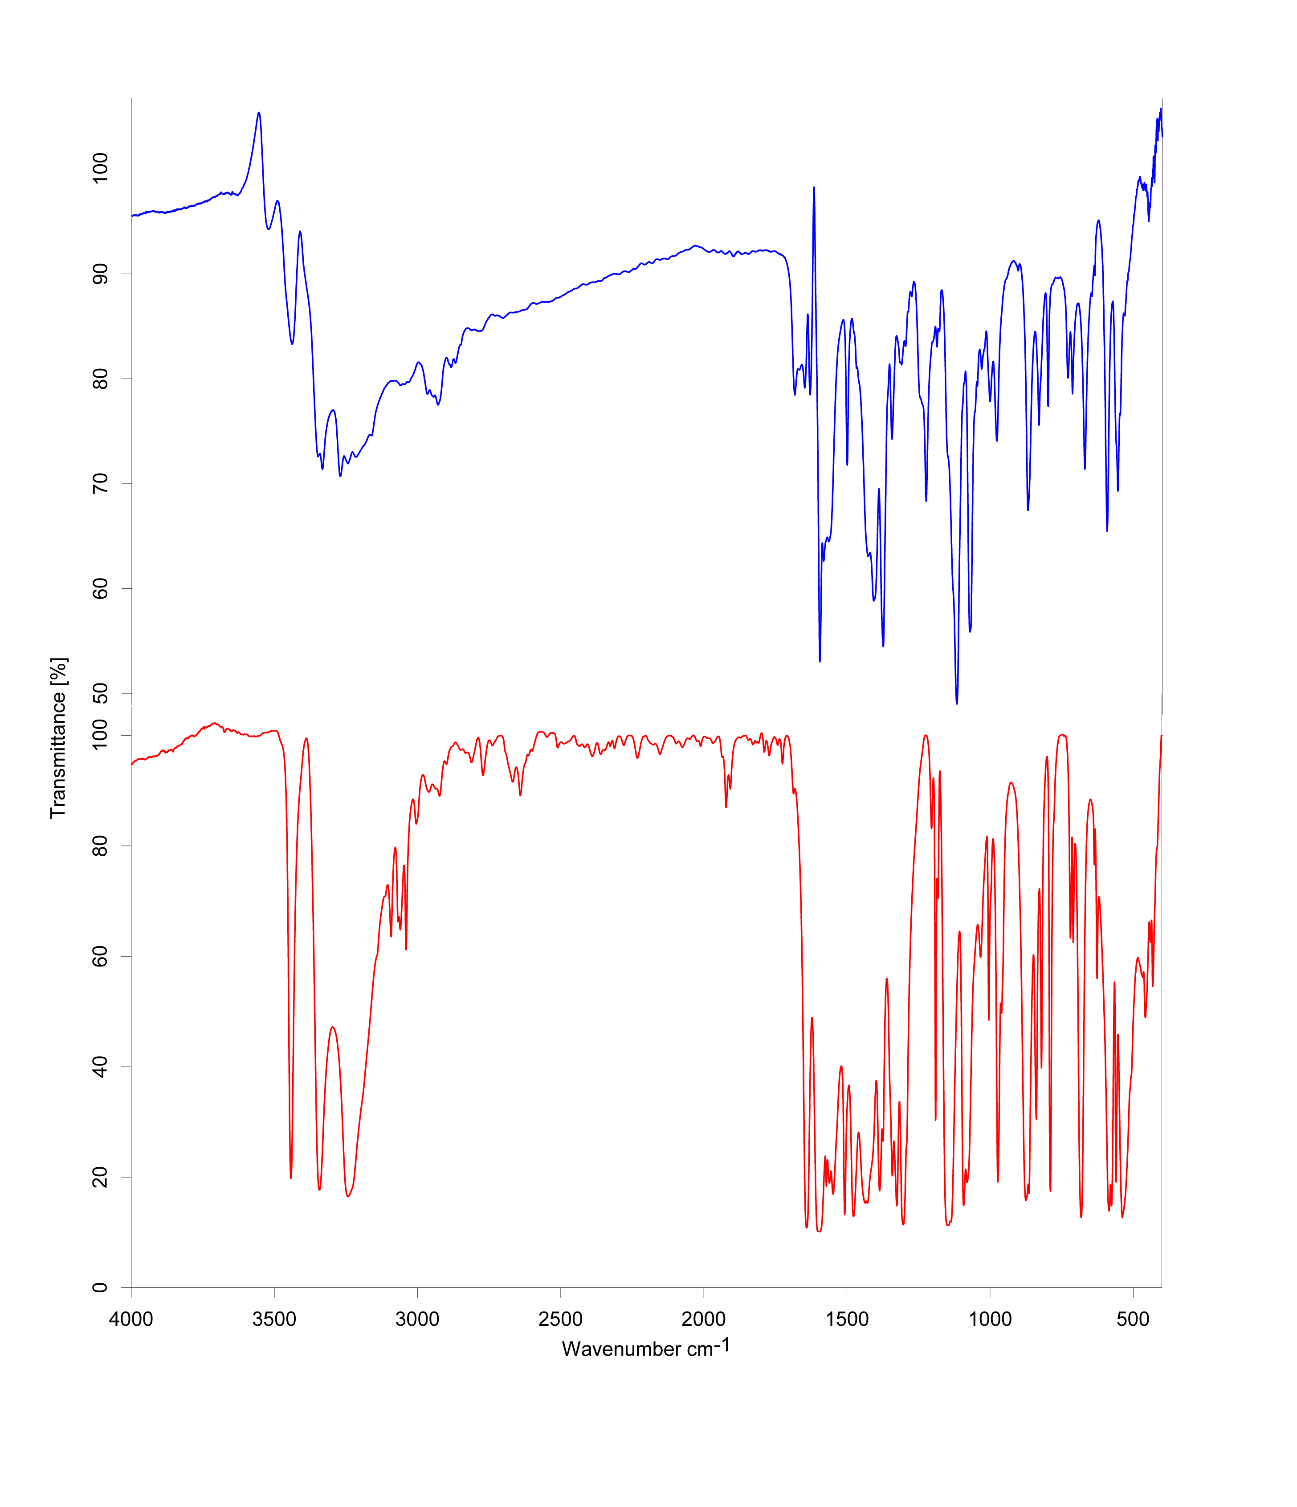


Figure S3. The FT-IR spectra of (a) 2([Cu(hydeten)2]∙smz2)∙na∙5H2O, (b) the free smz.
